# Supplementary material for: Assembly of a series of coordination polymers built from rigid a tetracarboxylate ligand and flexible bis(imidazole) linker: syntheses, structural diversities, luminescence sensing, and photocatalytic properties
Source: Royal Society of Chemistry journal article supplement (doi:10.1039/c7dt03761a), 2017-11-28
Supplement: c7dt03761a1.pdf [file c7dt03761a1.pdf]

## Assembly of a series of coordination polymers built from rigid tetracarboxylate ligand and flexible bis(imidazole) linker: syntheses, structural diversities, luminescence sensing, and photocatalytic properties

Xiu-Tang Zhang,\* Hong-Tai Chen, Bin Li, Guang-Zeng Liu, Xin-Zheng Liu

**Table S1.** Selected bond lengths and bond angles for compounds 1-4.

| Compound 1                                                                                                                                                                                                                                    |                 |                  |                 |
|-----------------------------------------------------------------------------------------------------------------------------------------------------------------------------------------------------------------------------------------------|-----------------|------------------|-----------------|
| N(1)-Zn(1)                                                                                                                                                                                                                                    | N(1)-Zn(1)      | N(1)-Zn(1)       | N(1)-Zn(1)      |
| O(2)-Zn(1)                                                                                                                                                                                                                                    | O(2)-Zn(1)      | O(2)-Zn(1)       | O(2)-Zn(1)      |
| O(2)-Zn(1)-N(1)                                                                                                                                                                                                                               | O(2)-Zn(1)-N(1) | O(2)-Zn(1)-N(1)  | O(2)-Zn(1)-N(1) |
| O(3)-Zn(1)-O(2)                                                                                                                                                                                                                               | O(3)-Zn(1)-O(2) | O(3)-Zn(1)-O(2)  | O(3)-Zn(1)-O(2) |
| Symmetry transformations used to generate equivalent atoms: #1 -x+3/2,y+1/2,-z+1/2 #2 x-1/2,-y+1/2,z-1/2 #3 -x-1/2,y-1/2,-z+1/2 #4 x+1/2,-y+1/2,z+1/2 #5 -x+3/2,y-1/2,-z+1/2 #6 -x-1/2,y+1/2,-z+1/2.                                          |                 |                  |                 |
| Compound 2                                                                                                                                                                                                                                    |                 |                  |                 |
| N(1)-Ni(1)                                                                                                                                                                                                                                    | 2.107(5)        | N(3)-Ni(2)       | 2.092(5)        |
| N(5)-Ni(2)                                                                                                                                                                                                                                    | 2.077(4)        | N(7)-Ni(1)       | 2.092(4)        |
| Ni(1)-O(4)                                                                                                                                                                                                                                    | 2.042(3)        | Ni(1)-O(1)       | 2.052(3)        |
| Ni(1)-O(5)                                                                                                                                                                                                                                    | 2.082(3)        | Ni(1)-O(9)       | 2.148(4)        |
| Ni(2)-O(2)                                                                                                                                                                                                                                    | 2.046(4)        | Ni(2)-O(3)       | 2.058(4)        |
| Ni(2)-O(7)                                                                                                                                                                                                                                    | 2.066(4)        | Ni(2)-O(9)       | 2.086(3)        |
| O(4)-Ni(1)-O(1)                                                                                                                                                                                                                               | 95.38(15)       | O(4)-Ni(1)-O(5)  | 173.93(15)      |
| O(1)-Ni(1)-O(5)                                                                                                                                                                                                                               | 88.33(15)       | O(4)-Ni(1)-N(7)  | 88.67(16)       |
| O(1)-Ni(1)-N(7)                                                                                                                                                                                                                               | 173.05(16)      | O(5)-Ni(1)-N(7)  | 88.12(16)       |
| O(4)-Ni(1)-N(1)                                                                                                                                                                                                                               | 87.03(17)       | O(1)-Ni(1)-N(1)  | 87.04(18)       |
| O(5)-Ni(1)-N(1)                                                                                                                                                                                                                               | 88.38(17)       | N(7)-Ni(1)-N(1)  | 98.82(19)       |
| O(4)-Ni(1)-O(9)                                                                                                                                                                                                                               | 94.53(14)       | O(1)-Ni(1)-O(9)  | 89.02(14)       |
| O(5)-Ni(1)-O(9)                                                                                                                                                                                                                               | 90.32(14)       | N(7)-Ni(1)-O(9)  | 85.03(15)       |
| N(1)-Ni(1)-O(9)                                                                                                                                                                                                                               | 175.89(17)      | O(2)-Ni(2)-O(3)  | 96.77(17)       |
| O(2)-Ni(2)-O(7)                                                                                                                                                                                                                               | 175.21(16)      | O(3)-Ni(2)-O(7)  | 87.33(15)       |
| O(2)-Ni(2)-N(5)                                                                                                                                                                                                                               | 87.12(18)       | O(3)-Ni(2)-N(5)  | 85.42(17)       |
| O(7)-Ni(2)-N(5)                                                                                                                                                                                                                               | 90.75(18)       | O(2)-Ni(2)-O(9)  | 91.84(16)       |
| O(3)-Ni(2)-O(9)                                                                                                                                                                                                                               | 88.62(15)       | O(7)-Ni(2)-O(9)  | 90.72(14)       |
| N(5)-Ni(2)-O(9)                                                                                                                                                                                                                               | 173.78(17)      | O(2)-Ni(2)-N(3)  | 87.2(2)         |
| O(3)-Ni(2)-N(3)                                                                                                                                                                                                                               | 176.0(2)        | O(7)-Ni(2)-N(3)  | 88.76(19)       |
| N(5)-Ni(2)-N(3)                                                                                                                                                                                                                               | 95.6(2)         | O(9)-Ni(2)-N(3)  | 90.50(18)       |
| Ni(2)-O(9)-Ni(1)                                                                                                                                                                                                                              | 115.49(14)      | Ni(2)-O(9)-H(1W) | 114(6)          |
| Ni(1)-O(9)-H(1W)                                                                                                                                                                                                                              | 107(5)          |                  |                 |
| Symmetry transformations used to generate equivalent atoms: #1 -x+1,-y+2,z-1/2 #2 -x+3/2,y,z-1/2 #3 x+1/2,-y+1,z #4 x-1/2,-y+1,z #5 -x+1,-y+1,z-1/2 #6 -x+1,-y+2,z+1/2 #7 -x+3/2,y,z+1/2 #8 x+1/2,-y+2,z #9 -x+1,-y+1,z+1/2 #10 x-1/2,-y+2,z. |                 |                  |                 |
| Compound 3                                                                                                                                                                                                                                    |                 |                  |                 |
| N(1)-Ni(1)                                                                                                                                                                                                                                    | 2.051(4)        | N(4)-Ni(1)       | 2.032(3)        |

|                                                                                                                                                            |            |                 |            |
|------------------------------------------------------------------------------------------------------------------------------------------------------------|------------|-----------------|------------|
| Ni(1)-O(9)                                                                                                                                                 | 2.033(5)   | Ni(1)-O(1)      | 2.055(3)   |
| Ni(1)-O(4)                                                                                                                                                 | 2.129(3)   | Ni(1)-O(3)      | 2.212(3)   |
| N(4)-Ni(1)-O(9)                                                                                                                                            | 98.00(19)  | N(4)-Ni(1)-N(1) | 91.23(15)  |
| O(9)-Ni(1)-N(1)                                                                                                                                            | 93.75(18)  | N(4)-Ni(1)-O(1) | 94.44(15)  |
| O(9)-Ni(1)-O(1)                                                                                                                                            | 87.03(17)  | N(1)-Ni(1)-O(1) | 174.11(15) |
| N(4)-Ni(1)-O(4)                                                                                                                                            | 161.22(16) | O(9)-Ni(1)-O(4) | 100.78(15) |
| N(1)-Ni(1)-O(4)                                                                                                                                            | 87.19(13)  | O(1)-Ni(1)-O(4) | 86.93(13)  |
| N(4)-Ni(1)-O(3)                                                                                                                                            | 100.83(15) | O(9)-Ni(1)-O(3) | 159.57(15) |
| N(1)-Ni(1)-O(3)                                                                                                                                            | 93.69(14)  | O(1)-Ni(1)-O(3) | 83.71(12)  |
| O(4)-Ni(1)-O(3)                                                                                                                                            | 60.65(11)  |                 |            |
| Symmetry transformations used to generate equivalent atoms: #1 -x-1,y-1/2,-z #2 -x-1,y+1/2,-z #3 x-1,y,z #4 x+1,y,z.                                       |            |                 |            |
| <b>Complex 4</b>                                                                                                                                           |            |                 |            |
| Cd(1)-N(3)                                                                                                                                                 | 2.233(3)   | Cd(1)-N(1)      | 2.263(3)   |
| Cd(1)-O(3)                                                                                                                                                 | 2.360(2)   | Cd(1)-O(1)      | 2.371(3)   |
| Cd(1)-O(4)                                                                                                                                                 | 2.383(2)   | Cd(1)-O(2)      | 2.407(3)   |
| N(3)-Cd(1)-N(1)                                                                                                                                            | 104.49(11) | N(3)-Cd(1)-O(3) | 89.46(10)  |
| N(1)-Cd(1)-O(3)                                                                                                                                            | 134.58(10) | N(3)-Cd(1)-O(1) | 124.02(13) |
| N(1)-Cd(1)-O(1)                                                                                                                                            | 120.87(12) | O(3)-Cd(1)-O(1) | 81.42(11)  |
| N(3)-Cd(1)-O(4)                                                                                                                                            | 131.01(11) | N(1)-Cd(1)-O(4) | 85.69(10)  |
| O(3)-Cd(1)-O(4)                                                                                                                                            | 54.68(8)   | O(1)-Cd(1)-O(4) | 86.08(11)  |
| N(3)-Cd(1)-O(2)                                                                                                                                            | 101.01(11) | N(1)-Cd(1)-O(2) | 88.25(12)  |
| O(3)-Cd(1)-O(2)                                                                                                                                            | 131.87(11) | O(1)-Cd(1)-O(2) | 53.74(11)  |
| O(4)-Cd(1)-O(2)                                                                                                                                            | 127.46(11) |                 |            |
| Symmetry transformations used to generate equivalent atoms: #1 x,-y+3/2,z-1/2 #2 x,-y+3/2,z+1/2 #3 -x-1,y+1/2,-z+1/2 #4 -x-1,-y+1,-z #5 -x-1,y-1/2,-z+1/2. |            |                 |            |

**Table S2. The hydrogen bonding data for compounds 3 and 4.**

| D-H...A           | d(H...A) / [Å] | d(D...A) / [Å] | ∠(D-H...A) / [°] |
|-------------------|----------------|----------------|------------------|
| <b>Compound 3</b> |                |                |                  |
| C31-H31...O5      | 2.61           | 3.31           | 132              |
| C33-H33A...O6     | 2.64           | 3.26           | 122              |
| <b>Compound 4</b> |                |                |                  |
| C1-H1...O1        | 2.55           | 3.46           | 164              |
| C12-H12...O1      | 2.42           | 3.33           | 165              |
| C4-H4B...O3       | 2.45           | 3.22           | 137              |
| C24-H24...O4      | 2.71           | 3.35           | 127              |
| C11-H11B...O4     | 2.77           | 3.39           | 123              |

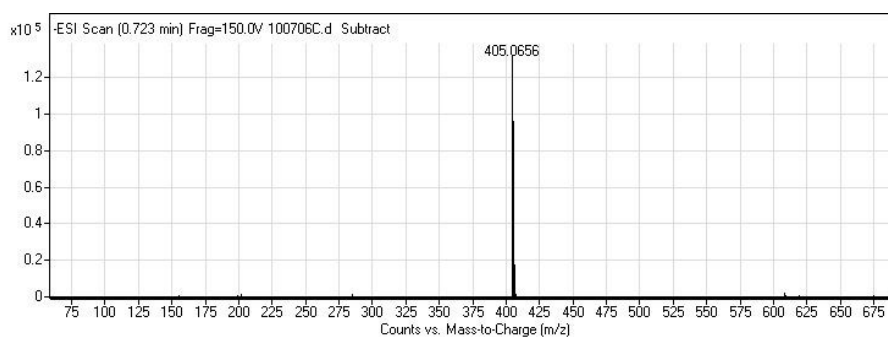

Figure S1. The mass spectrum of the as-synthesized H4tta.

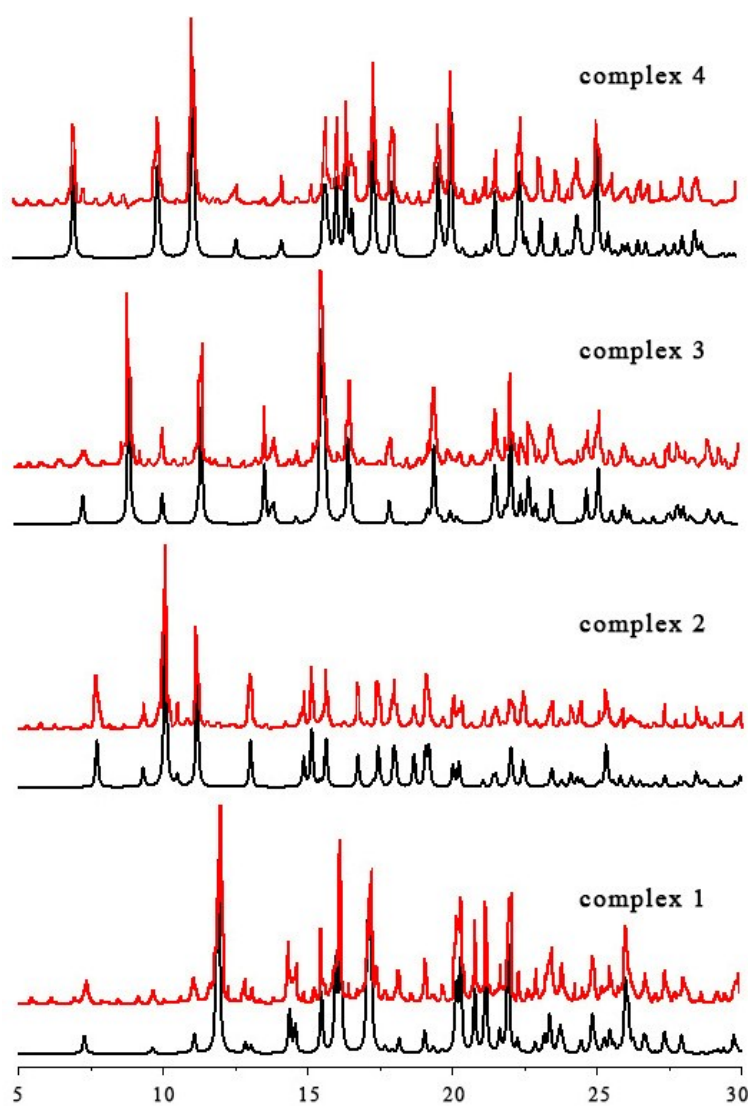

Figure S2. PXRD pattern of compounds 1–4.

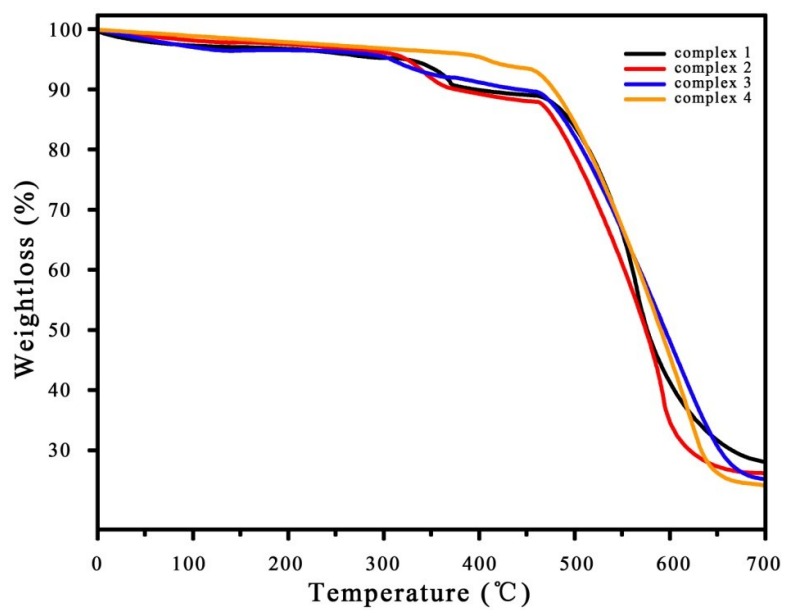

Figure S3. TGA curves for compounds 1–4.

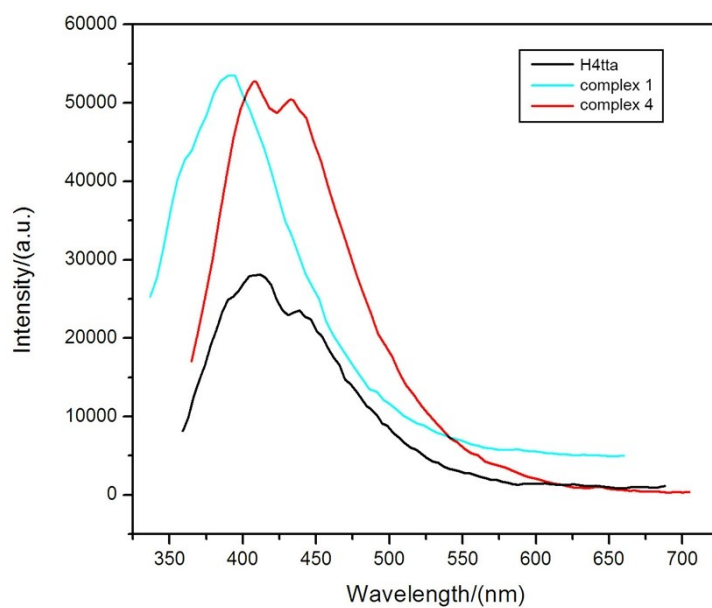

Figure S4. Emission spectra of compounds 1, 4 and H<sub>4</sub>tta ligand in the solid state at room temperature.

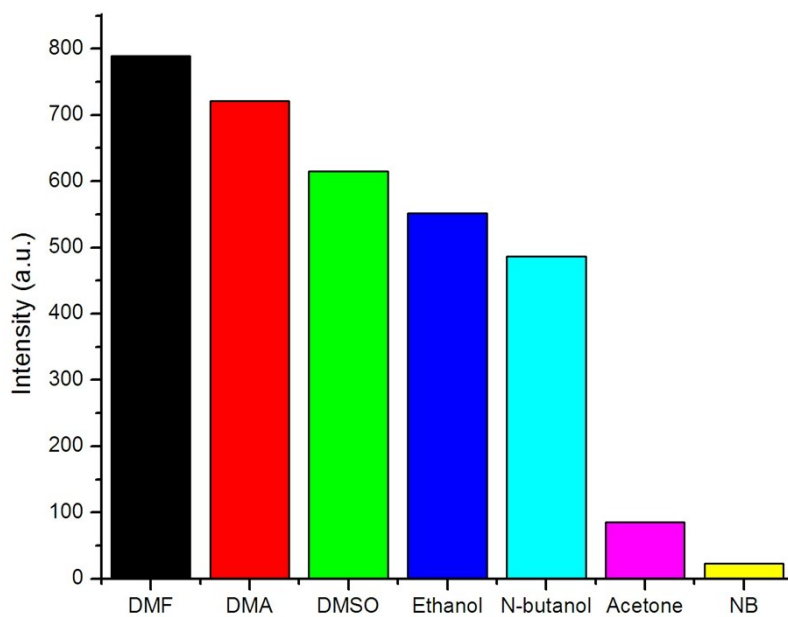

**Figure S5.** The luminescence intensities of compound **1** which were dispersed in different organic solvents.

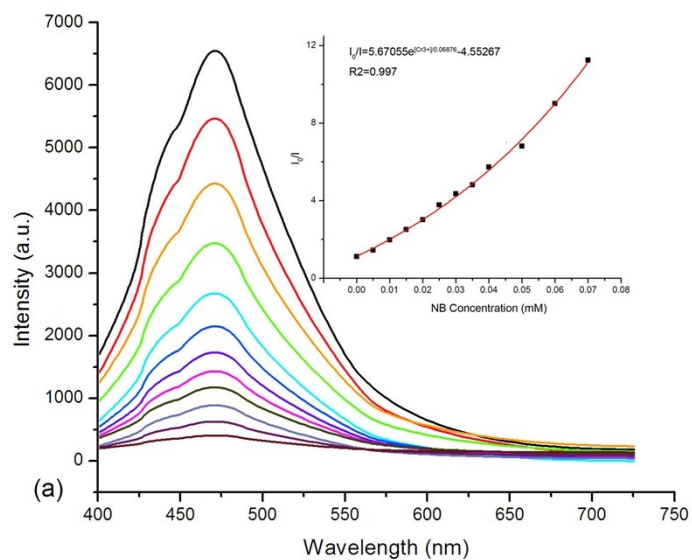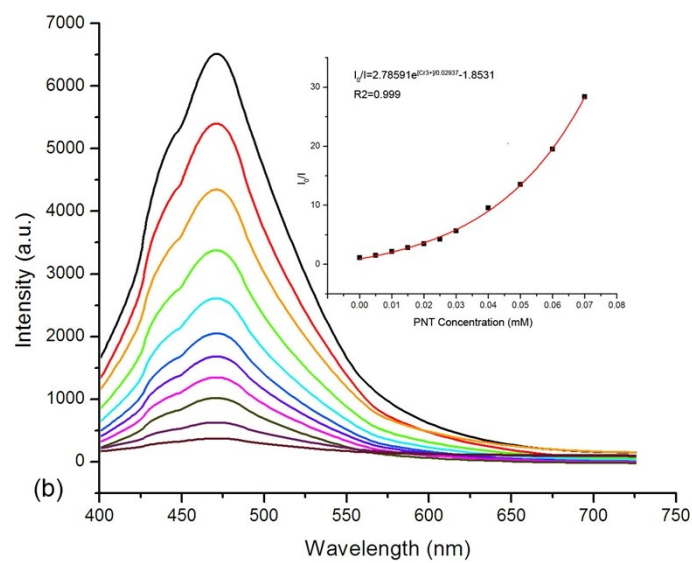

**Figure S6.** The PL spectra of the DMF suspension of **1** upon incremental addition of NB (a), and PNT (b). Inset: The luminescent intensity ( $I_0/I$ ) versus the NACs concentration.

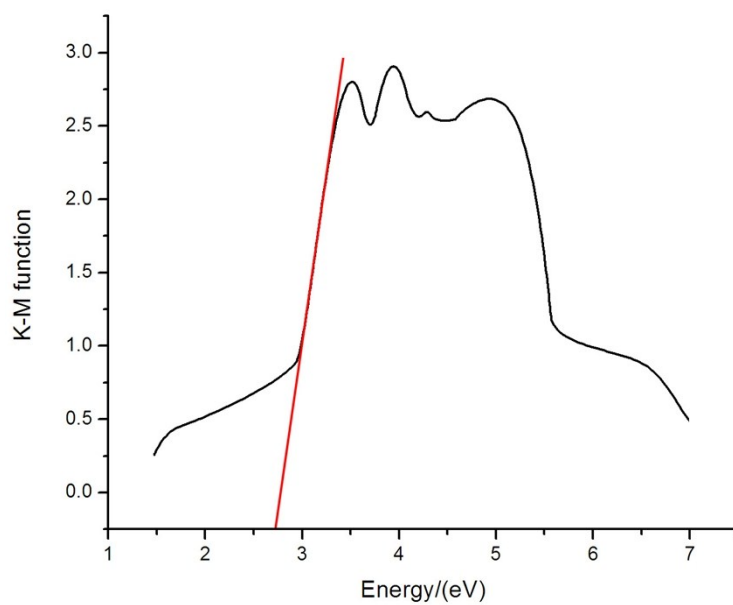

**Figure S7.** Diffuse reflectance spectra of Kubelka–Munk function versus energy of compound **1**.

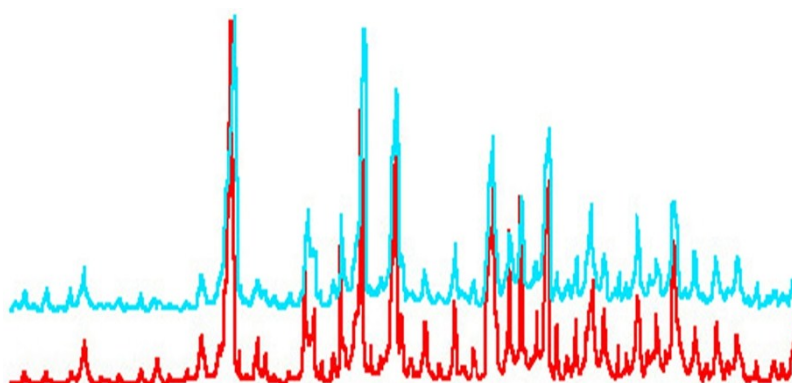

**Figure S8.** The PXR D of compound **1** before (red) and after (blue) the photocatalysis.
